# Supplementary material for: From an electride-like super alkali earth atom to a superalkalide or superalkali electride: M(HF)3M (M = Na or Li) as field-induced excellent inorganic NLO molecular switches
Source: Royal Society of Chemistry journal article supplement (doi:10.1039/d1tc03337a), 2021-01-01
Supplement: d1tc03337a1.pdf [file d1tc03337a1.pdf]

Supporting Information

## **From Electride-like Super Alkali Earth Atom to Superalkalide or Superalkali Electride: $M(\text{HF})_3M$ ( $M = \text{Na}$ or $\text{Li}$ ) as Field-Induced Excellent Inorganic NLO Molecular Switches**

Yin-Feng Wang,<sup>\*a</sup> Jia-Jun Wang,<sup>\*b</sup> Jia Li,<sup>a</sup> Xue-Xia Liu,<sup>a</sup> Zhi-Jun Wang,<sup>a</sup> Jianguo Huang,<sup>a</sup> and Zhi-Ru Li<sup>\*c</sup>

---

<sup>a</sup> Jiangxi Province Key Laboratory of Coordination Chemistry, School of Chemistry and Chemical Engineering, Jinggangshan University, Ji'an, Jiangxi 343009 (P.R. China). E-mail: [cyclont@yeah.net](mailto:cyclont@yeah.net)

<sup>b</sup> Key Laboratory of Preparation and Application of Environmentally Friendly Materials, Ministry of Education, Jilin Normal University, Changchun, Jilin 130103 (P.R. China). E-mail: [jiajunwang@jlnu.edu.cn](mailto:jiajunwang@jlnu.edu.cn)

<sup>c</sup> Institute of Theoretical Chemistry, Jilin University, Changchun 130023 (P.R. China) E-mail: [lzc@jlu.edu.cn](mailto:lzr@jlu.edu.cn)

## Contents

|                                                                                                                                                                                                                                                                                                                                                                                                                          |     |
|--------------------------------------------------------------------------------------------------------------------------------------------------------------------------------------------------------------------------------------------------------------------------------------------------------------------------------------------------------------------------------------------------------------------------|-----|
| Optimized Cartesian coordinates of <b>1</b> ~ <b>5</b> of M(HF) <sub>3</sub> M (M = Li or Na) at the MP2/6-311+G(d,p) level.....                                                                                                                                                                                                                                                                                         | S1  |
| <b>Table S1.</b> Distances of M-M ( $L$ , in Å) and NPA charge of M1 and M2 ( $Q_{M1}$ and $Q_{M2}$ , in  e ) with increasing external electric field strength ( $F_z$ , $\times 10^{-4}$ au).....                                                                                                                                                                                                                       | S4  |
| <b>Table S2.</b> Total energy ( $E_{\text{tot}}$ , au), relative energy ( $E_{\text{rel}}$ , kcal/mol), energies of HOMOs ( $\varepsilon_{\text{HOMO}}$ , in eV), and HOMO-LUMO gaps ( $\varepsilon_{\text{gap}}$ , in eV), vertical ionization energy (VIE, in eV), and electron tunneling ionization ( $\omega$ , $\text{s}^{-1}$ ) of Na(HF) <sub>3</sub> Na with respect to OEEF ( $F_z$ , $\times 10^{-4}$ au)..... | S5  |
| <b>Table S3.</b> Total energy ( $E_{\text{tot}}$ , au), relative energy ( $E_{\text{rel}}$ , kcal/mol), energies of HOMOs ( $\varepsilon_{\text{HOMO}}$ , in eV), and HOMO-LUMO gaps ( $\varepsilon_{\text{gap}}$ , in eV), vertical ionization energy (VIE, in eV), and electron tunneling ionization ( $\omega$ , $\text{s}^{-1}$ ) of Li(HF) <sub>3</sub> Li with respect to OEEF ( $F_z$ , $\times 10^{-4}$ au)..... | S6  |
| <b>Table S4.</b> Calculated values of static electronic first hyperpolarizabilities ( $\beta_0^e$ ) of M(HF) <sub>3</sub> M with respect to M-M distance.....                                                                                                                                                                                                                                                            | S7  |
| <b>Table S5.</b> Calculated wavelengthes of $\lambda_{\text{max}}$ and $\lambda_2$ Na(HF) <sub>3</sub> Na at different methods with 6-311++G (3df, 3pd) basis set.....                                                                                                                                                                                                                                                   | S8  |
| <b>Table S6.</b> Calculated wavelengthes of $\lambda_{\text{max}}$ and $\lambda_2$ Li(HF) <sub>3</sub> Li at different methods with 6-311++G (3df, 3pd) basis set.....                                                                                                                                                                                                                                                   | S9  |
| <b>Fig. S1.</b> QTAIM analysis of <b>3</b> and <b>5</b> of Li(HF) <sub>3</sub> Li.....                                                                                                                                                                                                                                                                                                                                   | S10 |

Optimized Cartesian coordinates at the MP2/6-311+G(3df,3pd) level.

Na(HF)<sub>3</sub>Na

**1** C<sub>3h</sub>

|    |           |           |           |
|----|-----------|-----------|-----------|
| F  | -1.553508 | -0.816084 | 0.000000  |
| F  | 1.483503  | -0.937335 | 0.000000  |
| F  | 0.070004  | 1.753419  | 0.000000  |
| Na | 0.000000  | 0.000000  | 1.753986  |
| Na | 0.000000  | 0.000000  | -1.753986 |
| H  | 2.323508  | -0.519946 | 0.000000  |
| H  | -0.711467 | 2.272190  | 0.000000  |
| H  | -1.612041 | -1.752244 | 0.000000  |

**2** C<sub>3v</sub>

|    |             |             |             |
|----|-------------|-------------|-------------|
| F  | -1.88243476 | -1.08682421 | -0.56369219 |
| F  | 0.00000000  | 2.17364843  | -0.56369219 |
| F  | 1.88243476  | -1.08682421 | -0.56369219 |
| Na | 0.00000000  | 0.00000000  | -1.38840447 |
| Na | 0.00000000  | 0.00000000  | 2.68362337  |
| H  | -0.00001936 | 1.85739523  | 0.32409375  |
| H  | 1.60856113  | -0.92868085 | 0.32409375  |
| H  | -1.60854178 | -0.92871438 | 0.32409375  |

**3** C<sub>3v</sub>

|    |             |             |             |
|----|-------------|-------------|-------------|
| F  | -1.70824303 | 0.98625457  | 0.50297338  |
| F  | -0.00000000 | -1.97250914 | 0.50297338  |
| F  | 1.70824303  | 0.98625457  | 0.50297338  |
| Na | 0.00000000  | 0.00000000  | 1.68542789  |
| Na | 0.00000000  | 0.00000000  | -2.82017843 |
| H  | 0.00002457  | -1.60266344 | -0.36600840 |
| H  | 1.38793497  | 0.80135300  | -0.36600840 |
| H  | -1.38795954 | 0.80131044  | -0.36600840 |

**4** C<sub>3v</sub>

|    |             |             |             |
|----|-------------|-------------|-------------|
| F  | 1.55858449  | 0.89985460  | -0.50050479 |
| F  | -1.55857874 | 0.89988114  | -0.50050619 |
| F  | 0.00000369  | -1.79971892 | -0.50050686 |
| Na | -0.00000929 | -0.00001751 | 3.06657429  |
| Na | -0.00000836 | -0.00001642 | -1.99402815 |
| H  | -1.28876237 | 0.74406383  | 0.38427585  |
| H  | 0.00003290  | -1.48813926 | 0.38427398  |
| H  | 1.28873770  | 0.74409254  | 0.38427756  |

**5**  $C_{3v}$ 

|    |             |             |             |
|----|-------------|-------------|-------------|
| F  | 1.99760124  | 1.15422486  | -0.60499400 |
| F  | -1.99794560 | 1.15328776  | -0.60505056 |
| F  | 0.00027475  | -2.30732210 | -0.60494687 |
| Na | 0.00010621  | -0.00016777 | 2.68251738  |
| Na | 0.00008960  | -0.00021500 | -1.06860058 |
| H  | -1.80327531 | 1.04141217  | 0.30825415  |
| H  | -0.00020638 | -2.08284212 | 0.30836410  |
| H  | 1.80335550  | 1.04162218  | 0.30831208  |

Li(HF)<sub>3</sub>Li**1**  $C_{3h}$ 

|    |             |             |             |
|----|-------------|-------------|-------------|
| F  | -1.34185039 | 0.77471768  | 0.00000000  |
| F  | 0.00000000  | -1.54943537 | 0.00000000  |
| F  | 1.34185039  | 0.77471768  | 0.00000000  |
| Li | 0.00000000  | 0.00000000  | 1.36998402  |
| Li | 0.00000000  | 0.00000000  | -1.36998402 |
| H  | 0.83366812  | -2.01200133 | 0.00000000  |
| H  | 1.32561021  | 1.72797844  | 0.00000000  |
| H  | -2.15927833 | 0.28402289  | 0.00000000  |

**2**  $C_{3v}$ 

|    |             |             |             |
|----|-------------|-------------|-------------|
| F  | 0.32595415  | 1.62841702  | -0.25634459 |
| F  | 1.24730198  | -1.09647813 | -0.25633958 |
| F  | -1.57324208 | -0.53192924 | -0.25635332 |
| Li | 0.00000488  | -0.00000043 | -1.14064054 |
| Li | -0.00000855 | 0.00001285  | 2.81647363  |
| H  | 0.91823991  | -0.80720297 | 0.63128588  |
| H  | -1.15815092 | -0.39174712 | 0.63127233  |
| H  | 0.23979561  | 1.19882589  | 0.63127994  |

**3**  $C_{3v}$ 

|    |             |             |             |
|----|-------------|-------------|-------------|
| F  | -1.43869899 | 0.83063325  | 0.25876455  |
| F  | -0.00000000 | -1.66126650 | 0.25876455  |
| F  | 1.43869899  | 0.83063325  | 0.25876455  |
| Li | 0.00000000  | 0.00000000  | 1.16794636  |
| Li | 0.00000000  | 0.00000000  | -2.85919737 |
| H  | 0.00458838  | -1.27576019 | -0.63762992 |
| H  | 1.10254655  | 0.64185375  | -0.63762992 |
| H  | -1.10713493 | 0.63390644  | -0.63762992 |

**4**  $C_{3v}$ 

|    |             |             |             |
|----|-------------|-------------|-------------|
| F  | -1.43680253 | 0.82653111  | 0.28079814  |
| F  | 0.00260913  | -1.65756982 | 0.28079779  |
| F  | 1.43419423  | 0.83104235  | 0.28079734  |
| Li | -0.00000132 | 0.00000107  | 1.26246126  |
| Li | 0.00000638  | -0.00000057 | -3.02984903 |
| H  | 0.00200435  | -1.40059753 | -0.63428484 |
| H  | 1.21194181  | 0.70203625  | -0.63428453 |
| H  | -1.21395204 | 0.69855714  | -0.63428347 |

**5**  $C_{3v}$ 

|    |             |             |             |
|----|-------------|-------------|-------------|
| F  | -1.41879148 | 0.81819411  | 0.23531340  |
| F  | 0.00085773  | -1.63788361 | 0.23539077  |
| F  | 1.41803642  | 0.81962433  | 0.23538192  |
| Li | -0.00003976 | 0.00001301  | 1.12388197  |
| Li | -0.00011742 | 0.00005632  | -2.76110712 |
| H  | 0.00029631  | -1.07894123 | -0.63218833 |
| H  | 0.93416438  | 0.53983731  | -0.63220873 |
| H  | -0.93440618 | 0.53909977  | -0.63231121 |

**Table S1.** Distances of M-M ( $L$ , in Å) and NPA charge of M1 and M2 ( $Q_{M1}$  and  $Q_{M2}$ , in  $|e|$ ) with increasing external electric field strength ( $F_z$ ,  $\times 10^{-4}$  au).

| Field | Na(HF) <sub>3</sub> Na |           |           | Field | Li(HF) <sub>3</sub> Li |           |           |
|-------|------------------------|-----------|-----------|-------|------------------------|-----------|-----------|
|       | $L$                    | $Q_{Na1}$ | $Q_{Na2}$ |       | $L$                    | $Q_{Li1}$ | $Q_{Li2}$ |
| 30    | 3.751                  | -0.448    | 0.754     | 45    | 3.885                  | 0.462     | 0.957     |
| 25    | 3.788                  | -0.440    | 0.772     | 40    | 3.893                  | 0.412     | 0.958     |
| 20    | 3.832                  | -0.428    | 0.793     | 35    | 3.900                  | 0.368     | 0.959     |
| 15    | 3.890                  | -0.411    | 0.816     | 30    | 3.908                  | 0.327     | 0.959     |
| 10    | 3.966                  | -0.387    | 0.842     | 25    | 3.915                  | 0.288     | 0.960     |
| 5     | 4.072                  | -0.348    | 0.874     | 20    | 3.923                  | 0.250     | 0.961     |
| 0     | 4.216                  | -0.297    | 0.907     | 15    | 3.931                  | 0.213     | 0.962     |
| -5    | 4.354                  | -0.255    | 0.930     | 10    | 3.937                  | 0.175     | 0.962     |
| -10   | 4.461                  | -0.229    | 0.942     | 5     | 3.948                  | 0.139     | 0.963     |
| -15   | 4.542                  | -0.213    | 0.950     | 0     | 4.027                  | 0.103     | 0.963     |
| -20   | 4.608                  | -0.209    | 0.954     | -5    | 3.969                  | 0.068     | 0.964     |
| -25   | 4.666                  | -0.202    | 0.958     | -10   | 3.981                  | 0.032     | 0.965     |
| -30   | 4.717                  | -0.201    | 0.960     | -15   | 3.994                  | -0.004    | 0.965     |
| -35   | 4.764                  | -0.203    | 0.961     | -20   | 4.006                  | -0.041    | 0.966     |
| -40   | 4.809                  | -0.206    | 0.962     | -25   | 4.020                  | -0.078    | 0.966     |
| -45   | 4.854                  | -0.211    | 0.963     | -30   | 4.033                  | -0.115    | 0.968     |
| -50   | 4.901                  | -0.218    | 0.963     | -35   | 4.050                  | -0.153    | 0.968     |
| -55   | 4.949                  | -0.227    | 0.963     | -40   | 4.067                  | -0.192    | 0.970     |
| -60   | 5.001                  | -0.237    | 0.963     | -45   | 4.084                  | -0.231    | 0.970     |
| -65   | 5.061                  | -0.252    | 0.962     | -50   | 4.103                  | -0.270    | 0.970     |
| -70   | 3.751                  | -0.448    | 0.754     | -55   | 4.124                  | -0.310    | 0.971     |
|       |                        |           |           | -60   | 4.145                  | -0.351    | 0.971     |
|       |                        |           |           | -65   | 4.169                  | -0.393    | 0.971     |
|       |                        |           |           | -70   | 4.195                  | -0.436    | 0.972     |
|       |                        |           |           | -75   | 4.224                  | -0.479    | 0.972     |
|       |                        |           |           | -80   | 4.257                  | -0.525    | 0.970     |
|       |                        |           |           | -85   | 4.292                  | -0.590    | 0.971     |
|       |                        |           |           | -90   | 4.339                  | -0.643    | 0.971     |
|       |                        |           |           | -95   | 4.407                  | -0.708    | 0.970     |
|       |                        |           |           | -100  | 4.541                  | -0.797    | 0.966     |

**Table S2.** Total energy ( $E_{\text{tot}}$ , au), relative energy ( $E_{\text{rel}}$ , kcal/mol), energies of HOMOs ( $\varepsilon_{\text{HOMO}}$ , in eV), and HOMO-LUMO gaps ( $\varepsilon_{\text{gap}}$ , in eV), vertical ionization energy (VIE, in eV), and electron tunneling ionization ( $\omega$ ,  $\text{s}^{-1}$ ) of  $\text{Na}(\text{HF})_3\text{Na}$  with respect to OEEF ( $F_z$ ,  $\times 10^{-4}$  au).

| Field | $E_{\text{tot}}$ | $E_{\text{rel}}$ | $\varepsilon_{\text{HOMO}}$ | $\varepsilon_{\text{gap}}$ | VIE   | $\omega$                |
|-------|------------------|------------------|-----------------------------|----------------------------|-------|-------------------------|
| 25    | -624.7436        | 0.315            | -4.718                      | 4.887                      | 4.961 | $1.62 \times 10^{-7}$   |
| 20    | -624.7438        | 0.228            | -4.709                      | 4.866                      | 4.953 | $1.03 \times 10^{-13}$  |
| 15    | -624.7439        | 0.144            | -4.699                      | 4.841                      | 4.942 | $4.70 \times 10^{-24}$  |
| 10    | -624.7440        | 0.076            | -4.685                      | 4.807                      | 4.926 | $1.06 \times 10^{-44}$  |
| 5     | -624.7441        | 0.023            | -4.666                      | 4.763                      | 4.903 | $1.06 \times 10^{-106}$ |
| 0     | -624.7441        | 0.000            | -4.639                      | 4.701                      | 4.868 | -                       |
| -5    | -624.7441        | 0.036            | -4.597                      | 4.612                      | 4.810 | $1.06 \times 10^{-103}$ |
| -10   | -624.7439        | 0.141            | -4.551                      | 4.520                      | 4.746 | $2.56 \times 10^{-41}$  |
| -15   | -624.7437        | 0.287            | -4.511                      | 4.443                      | 4.688 | $6.72 \times 10^{-21}$  |
| -20   | -624.7434        | 0.446            | -4.479                      | 4.383                      | 4.645 | $7.29 \times 10^{-11}$  |
| -25   | -624.7431        | 0.625            | -4.446                      | 4.326                      | 4.607 | $6.48 \times 10^{-5}$   |
| -30   | -624.7429        | 0.809            | -4.421                      | 4.280                      | 4.574 | $5.37 \times 10^1$      |
| -35   | -624.7425        | 1.006            | -4.396                      | 4.235                      | 4.541 | $3.30 \times 10^2$      |
| -40   | -624.7422        | 1.220            | -4.371                      | 4.192                      | 4.512 | $3.81 \times 10^4$      |
| -45   | -624.7418        | 1.446            | -4.346                      | 4.151                      | 4.487 | $1.46 \times 10^6$      |
| -50   | -624.7414        | 1.708            | -4.320                      | 4.108                      | 4.458 | $2.71 \times 10^7$      |
| -55   | -624.7410        | 1.997            | -4.292                      | 4.062                      | 4.428 | $2.96 \times 10^8$      |
| -60   | -624.7404        | 2.325            | -4.263                      | 4.016                      | 4.397 | $2.15 \times 10^9$      |
| -65   | -624.7398        | 2.704            | -4.231                      | 3.966                      | 4.365 | $1.16 \times 10^{10}$   |
| -70   | -624.7391        | 3.166            | -4.194                      | 4.194                      | 4.328 | $4.96 \times 10^{10}$   |

**Table S3.** Total energy ( $E_{\text{tot}}$ , au), relative energy ( $E_{\text{rel}}$ , kcal/mol), energies of HOMOs ( $\varepsilon_{\text{HOMO}}$ , in eV), and HOMO-LUMO gaps ( $\varepsilon_{\text{gap}}$ , in eV), vertical ionization energy (VIE, in eV), and electron tunneling ionization ( $\omega$ ,  $\text{s}^{-1}$ ) of  $\text{Li}(\text{HF})_3\text{Li}$  with respect to OEEF ( $F_z$ ,  $\times 10^{-4}$  au).

| Field | $E_{\text{tot}}$ | $E_{\text{rel}}$ | $\varepsilon_{\text{HOMO}}$ | $\varepsilon_{\text{gap}}$ | VIE   | $\omega$                |
|-------|------------------|------------------|-----------------------------|----------------------------|-------|-------------------------|
| 45    | -315.9531        | 0.988            | -5.624                      | 4.394                      | 6.035 | $4.60 \times 10^{-1}$   |
| 40    | -315.9536        | 0.709            | -5.551                      | 4.499                      | 5.951 | $5.87 \times 10^{-3}$   |
| 35    | -315.9539        | 0.505            | -5.505                      | 4.628                      | 5.885 | $1.64 \times 10^{-5}$   |
| 30    | -315.9541        | 0.352            | -5.474                      | 4.771                      | 5.831 | $5.38 \times 10^{-9}$   |
| 25    | -315.9543        | 0.235            | -5.454                      | 4.922                      | 5.784 | $6.01 \times 10^{-14}$  |
| 20    | -315.9545        | 0.146            | -5.441                      | 5.076                      | 5.741 | $1.93 \times 10^{-21}$  |
| 15    | -315.9546        | 0.080            | -5.434                      | 5.229                      | 5.702 | $5.21 \times 10^{-34}$  |
| 10    | -315.9547        | 0.034            | -5.430                      | 5.377                      | 5.663 | $3.13 \times 10^{-59}$  |
| 5     | -315.9547        | 0.008            | -5.431                      | 5.517                      | 5.563 | $1.32 \times 10^{-132}$ |
| 0     | -315.9547        | 0.000            | -5.437                      | 5.625                      | 5.595 | -                       |
| -5    | -315.9547        | 0.008            | -5.446                      | 5.501                      | 5.563 | $1.32 \times 10^{-132}$ |
| -10   | -315.9547        | 0.034            | -5.458                      | 5.336                      | 5.532 | $1.42 \times 10^{-56}$  |
| -15   | -315.9546        | 0.075            | -5.471                      | 5.158                      | 5.501 | $2.65 \times 10^{-31}$  |
| -20   | -315.9545        | 0.135            | -5.487                      | 4.974                      | 5.471 | $1.01 \times 10^{-18}$  |
| -25   | -315.9544        | 0.211            | -5.505                      | 4.786                      | 5.440 | $3.37 \times 10^{-11}$  |
| -30   | -315.9542        | 0.303            | -5.526                      | 4.597                      | 5.412 | $3.28 \times 10^{-6}$   |
| -35   | -315.9540        | 0.418            | -5.547                      | 4.404                      | 5.381 | $1.20 \times 10^{-2}$   |
| -40   | -315.9538        | 0.549            | -5.571                      | 4.211                      | 5.350 | $5.49 \times 10^0$      |
| -45   | -315.9536        | 0.703            | -5.597                      | 4.019                      | 5.320 | $6.34 \times 10^2$      |
| -50   | -315.9533        | 0.878            | -5.624                      | 3.828                      | 5.289 | $2.79 \times 10^4$      |
| -55   | -315.9530        | 1.078            | -5.654                      | 3.637                      | 5.257 | $6.12 \times 10^5$      |
| -60   | -315.9526        | 1.304            | -5.686                      | 3.448                      | 5.225 | $7.98 \times 10^6$      |
| -65   | -315.9522        | 1.560            | -5.721                      | 3.262                      | 5.192 | $6.98 \times 10^7$      |
| -70   | -315.9518        | 1.852            | -5.758                      | 3.077                      | 5.158 | $4.48 \times 10^8$      |
| -75   | -315.9512        | 2.191            | -5.797                      | 2.896                      | 5.122 | $2.25 \times 10^9$      |
| -80   | -315.9506        | 2.585            | 0.971                       | 0.966                      | 5.083 | $9.29 \times 10^9$      |
| -85   | -315.9498        | 3.057            | -5.889                      | 2.549                      | 5.038 | $3.31 \times 10^{10}$   |
| -90   | -315.9489        | 3.672            | -5.946                      | 2.392                      | 4.986 | $1.05 \times 10^{11}$   |
| -95   | -315.9473        | 4.625            | -6.016                      | 2.254                      | 4.913 | $3.21 \times 10^{11}$   |
| -100  | -315.9440        | 6.697            | -6.103                      | 2.149                      | 4.777 | $1.11 \times 10^{12}$   |



**Table S4.** Calculated values of static electronic first hyperpolarizabilities ( $\beta_0^e$ ) of  $M(\text{HF})_3M$  with respect to M-M distance.

| Na(HF) <sub>3</sub> Na |                       | Li(HF) <sub>3</sub> Li |                       |
|------------------------|-----------------------|------------------------|-----------------------|
| Na-Na Distance<br>(Å)  | $\beta_0^e$<br>(a.u.) | Na-Na Distance<br>(Å)  | $\beta_0^e$<br>(a.u.) |
| 3.751                  | 1851                  | 3.885                  | 4984                  |
| 3.788                  | 1583                  | 3.893                  | 4935                  |
| 3.832                  | 1223                  | 3.900                  | 4867                  |
| 3.890                  | 751                   | 3.908                  | 4792                  |
| 3.966                  | 45                    | 3.915                  | 4711                  |
| 4.027                  | 1162                  | 3.923                  | 4625                  |
| 4.216                  | 3400                  | 3.931                  | 4535                  |
| 4.354                  | 6500                  | 3.937                  | 4435                  |
| 4.461                  | 9778                  | 3.948                  | 4336                  |
| 4.506                  | 11727                 | 3.957                  | 4240                  |
| 4.542                  | 12838                 | 3.969                  | 4130                  |
| 4.608                  | 15798                 | 3.981                  | 4019                  |
| 4.666                  | 18821                 | 3.994                  | 3904                  |
| 4.717                  | 21787                 | 4.006                  | 3779                  |
| 4.764                  | 24871                 | 4.020                  | 3649                  |
| 4.809                  | 27993                 | 4.027                  | 3589                  |
| 4.854                  | 31495                 | 4.033                  | 3513                  |
| 4.901                  | 35200                 | 4.050                  | 3365                  |
| 4.949                  | 39322                 | 4.067                  | 3210                  |
| 5.001                  | 43976                 | 4.084                  | 3044                  |
| 5.061                  | 49348                 | 4.103                  | 2866                  |
|                        |                       | 4.124                  | 2675                  |
|                        |                       | 4.145                  | 2467                  |
|                        |                       | 4.169                  | 2240                  |
|                        |                       | 4.195                  | 1989                  |
|                        |                       | 4.224                  | 1703                  |
|                        |                       | 4.257                  | 1376                  |

**Table S5.** Calculated wavelenghtes of  $\lambda_{\max}$  and  $\lambda_2$  of  $\text{Na}(\text{HF})_3\text{Na}$  at different methods with 6-311++G (3df, 3pd) basis set.

|                  |  | Na(HF) <sub>3</sub> Na |            |          |              |           |           |
|------------------|--|------------------------|------------|----------|--------------|-----------|-----------|
|                  |  | TD-M062X               | TD-LC-BLYP | TD-B3LYP | TD-CAM-B3LYP | TD-WB97XD | TD-PBEPBE |
| $\lambda_{\max}$ |  |                        |            |          |              |           |           |
| <b>1</b>         |  | 688                    | 709        | 663      | 683          | 777       | 662       |
| <b>2</b>         |  | 456                    | 436        | 446      | 440          | 461       | 451       |
| <b>3</b>         |  | 458                    | 433        | 449      | 441          | 462       | 455       |
| <b>4</b>         |  | 487                    | 458        | 476      | 467          | 488       | 481       |
| $\lambda_2$      |  |                        |            |          |              |           |           |
| <b>1</b>         |  | 822                    | 829        | 763      | 791          | 890       | 772       |
| <b>2</b>         |  | 514                    | 494        | 575      | 527          | 507       | 582       |
| <b>3</b>         |  | 564                    | 535        | 682      | 596          | 536       | 697       |
| <b>4</b>         |  | 679                    | 640        | 866      | 742          | 621       | 882       |

**Table S6.** Calculated wavelenghtes of  $\lambda_{\max}$  and  $\lambda_2$  of  $\text{Li}(\text{HF})_3\text{Li}$  at different methods with 6-311++G (3df, 3pd) basis set.

|                  |  | Na(HF) <sub>3</sub> Na |            |          |              |           |           |
|------------------|--|------------------------|------------|----------|--------------|-----------|-----------|
|                  |  | TD-M062X               | TD-LC-BLYP | TD-B3LYP | TD-CAM-B3LYP | TD-WB97XD | TD-PBEPBE |
| $\lambda_{\max}$ |  |                        |            |          |              |           |           |
| <b>1</b>         |  | 679                    | 731        | 672      | 697          | 755       | 666       |
| <b>2</b>         |  | 427                    | 391        | 418      | 403          | 412       | 432       |
| <b>3</b>         |  | 439                    | 405        | 429      | 416          | 425       | 437       |
| <b>5</b>         |  | 393                    | 359        | 395      | 376          | 384       | 409       |
| $\lambda_2$      |  |                        |            |          |              |           |           |
| <b>1</b>         |  | 715                    | 769        | 721      | 740          | 800       | 730       |
| <b>2</b>         |  | 516                    | 458        | 512      | 481          | 470       | 534       |
| <b>3</b>         |  | 533                    | 467        | 524      | 490          | 476       | 545       |
| <b>5</b>         |  | 473                    | 442        | 503      | 469          | 463       | 529       |

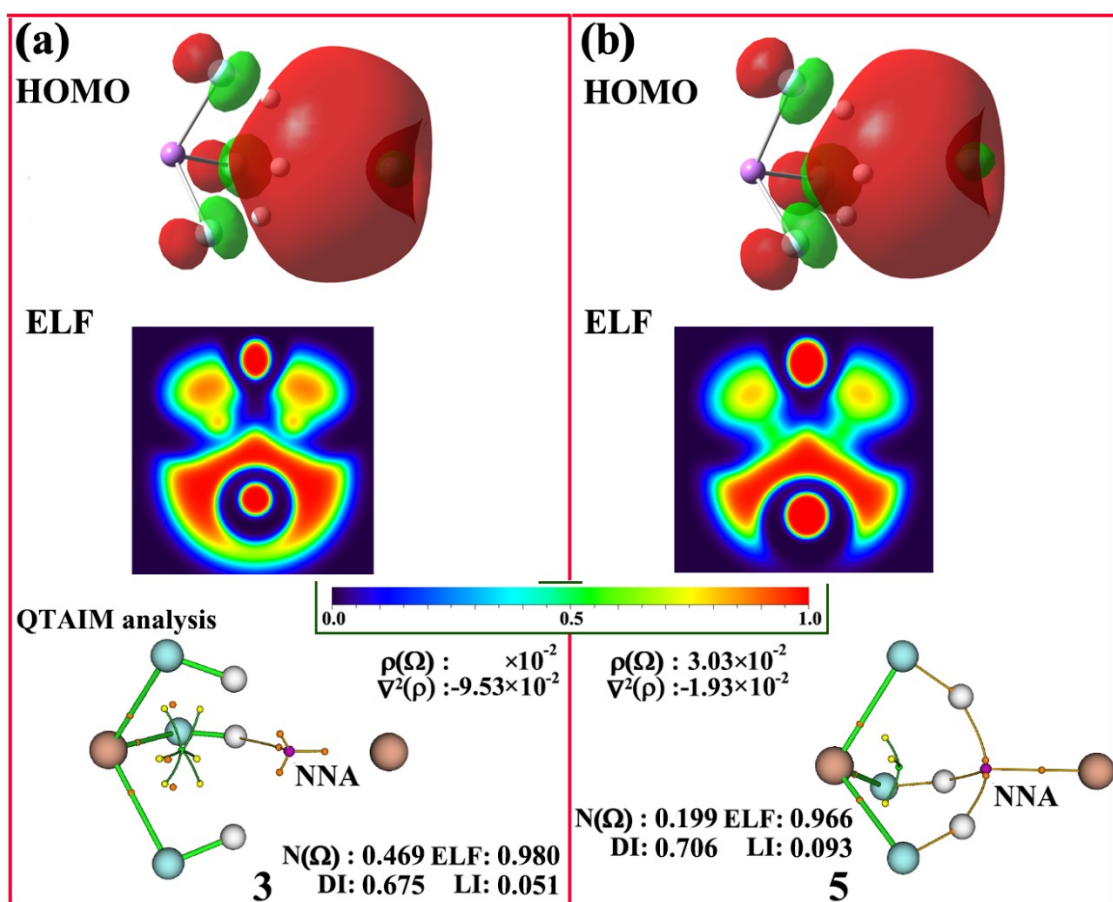

Fig. S1. QTAIM analysis of **3** and **5** of  $\text{Li}(\text{HF})_3\text{Li}$
